# Supplementary material for: Oleic acid assisted formation mechanism of CuInS2 nanocrystals with tunable structures
Source: Royal Society of Chemistry journal article supplement (doi:10.1039/c4ra03957b), 2014-01-01
Supplement: c4ra03957b1.pdf [file c4ra03957b1.pdf]

The supporting information for  
**Oleic acid assisted formation mechanism of CuInS<sub>2</sub> nanocrystals  
with tunable structures**

Fengcong Gong, Shouqin Tian\*, Baoshun Liu, Dehua Xiong, Xiuqian Zhao\*

State Key Laboratory of Silicate Materials for Architectures, Wuhan University of Technology  
(WHUT), No. 122, Luoshi Road, Wuhan 430070, P. R. China

\*Corresponding author. Tel.: +86-027-87652553; Fax: +86-027-87883743.

E-mail address: [tiansq@whut.edu.cn](mailto:tiansq@whut.edu.cn) (S. Tian), [opluse@whut.edu.cn](mailto:opluse@whut.edu.cn) (X. Zhao)

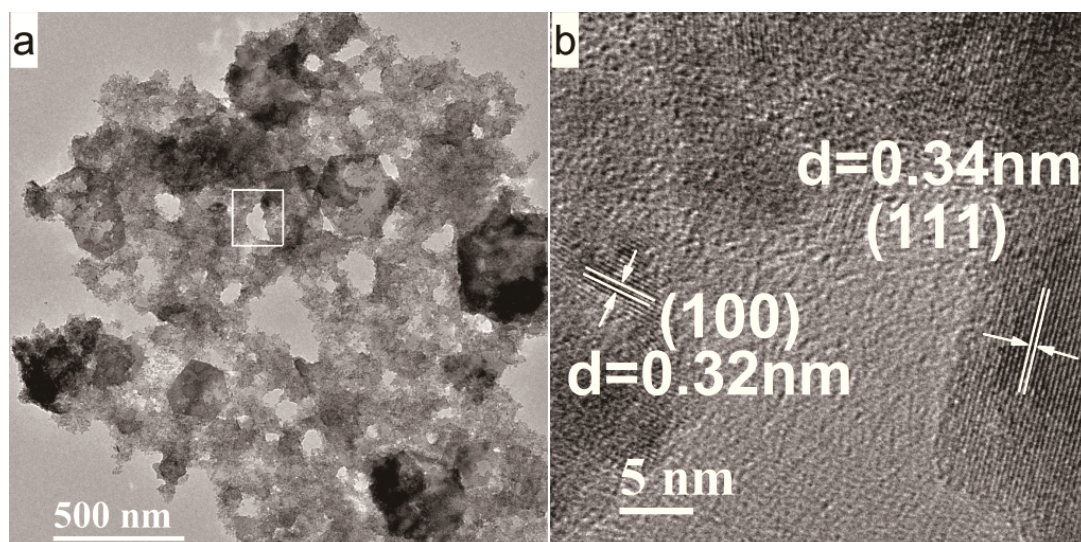

**Fig. S1** (a, b) TEM and HRTEM images of CIS nanoparticles synthesized using 2 mL OA at 200 °C for 60 min.

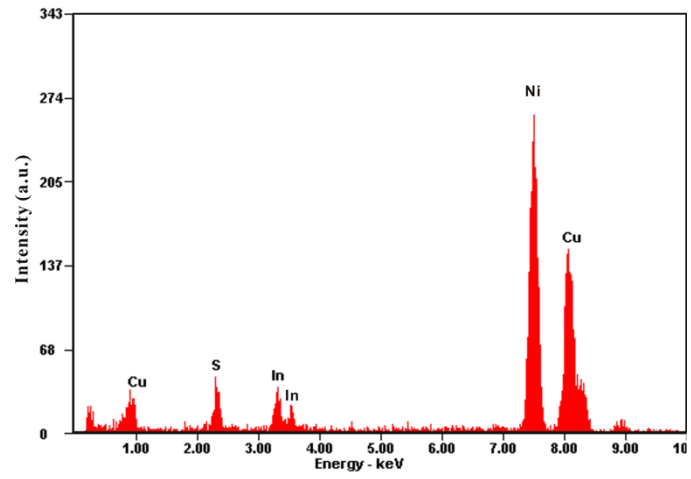

**Fig. S2** EDX spectrum of CuInS<sub>2</sub> nanoplates (The Ni peak is originated from Ni screen used as a support for samples in the TEM device).
